# Supplementary material
Source: HighWire-hosted journal article supplement (https://www.annfammed.org/highwire/filestream/8705/field_highwire_adjunct_files/1/Teepe_Supp_App.2.pdf)

## Overview of Sample Handling per Visit

### Observational study : Visit 1 (Pre-Treatment / Day 0)

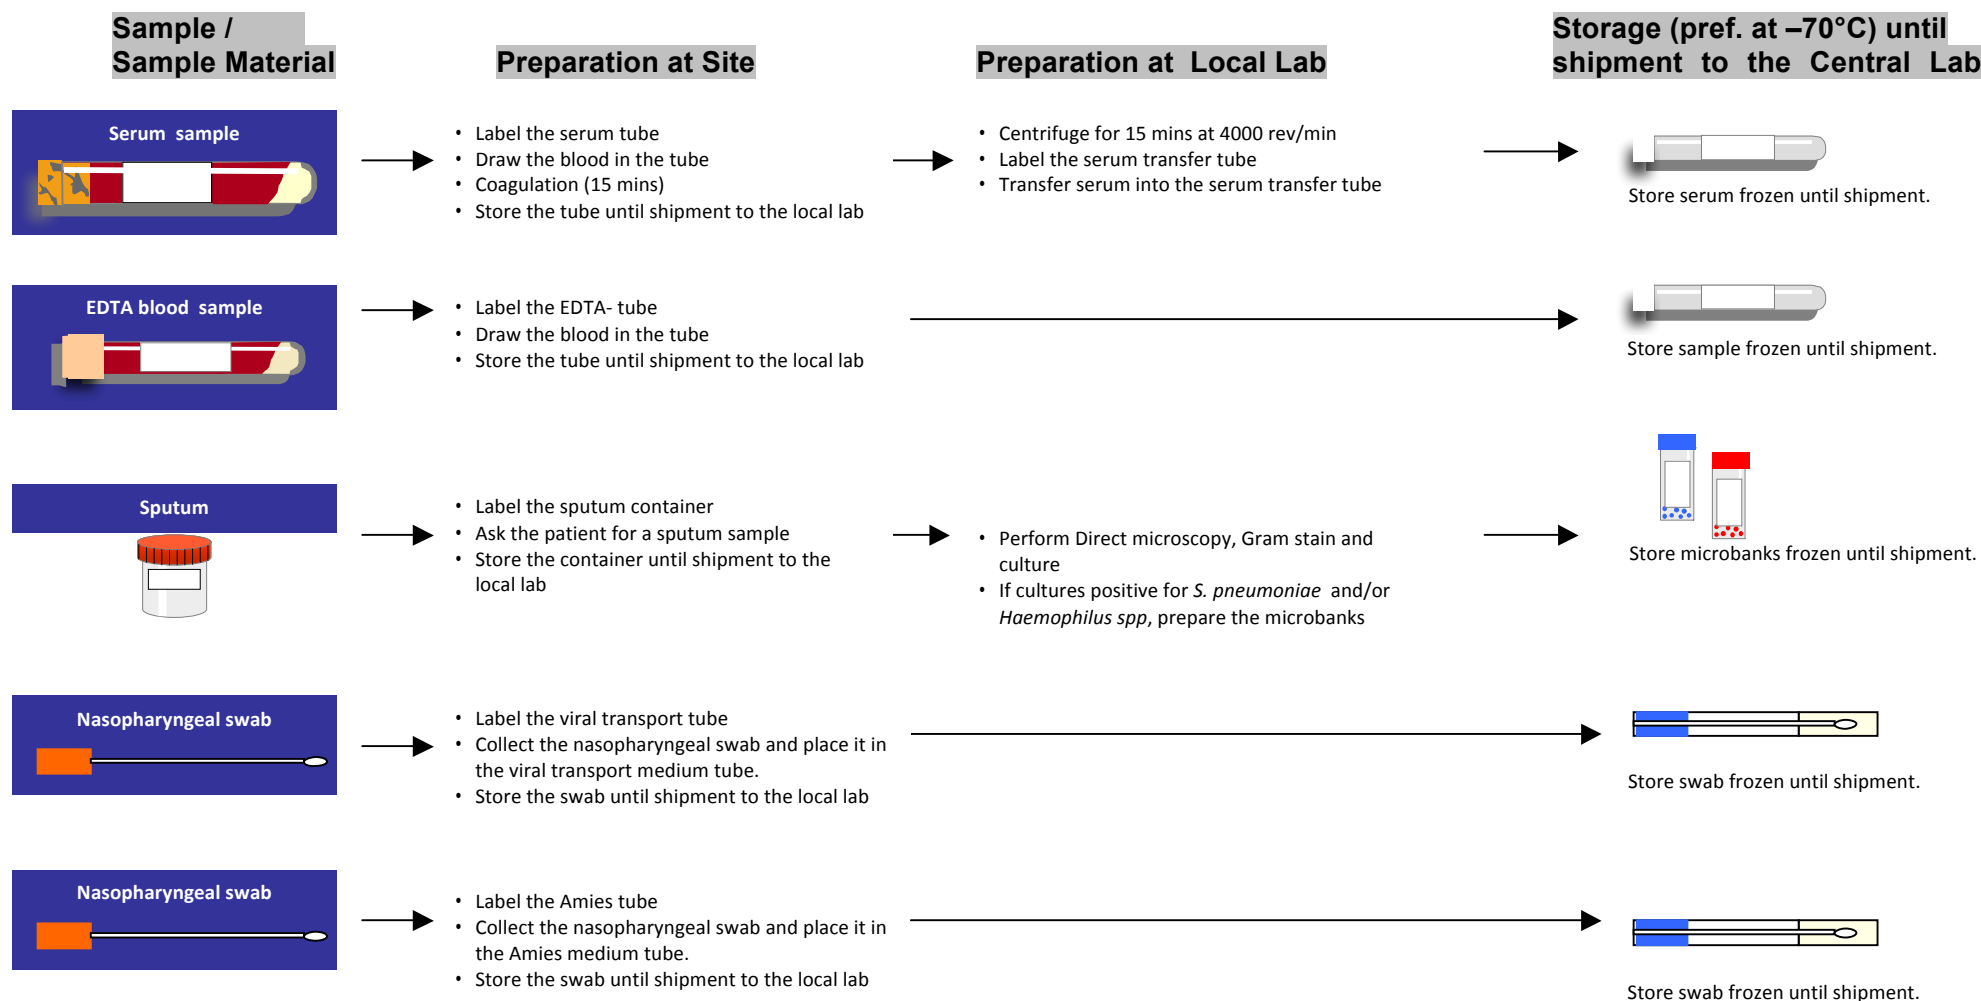

## Observational study: Visit 2 (4 weeks after first visit / Day 1)

### Sample / Sample Material

### Preparation at Site

### Preparation at Local Lab

### Storage (pref. at -70°C) until shipment to the Central Lab

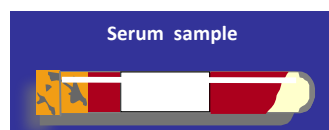

- Label the serum tube
- Draw the blood in the tube
- Coagulation (15 mins)
- Store the tube until shipment to the local lab

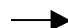

- Centrifuge for 15 mins at 4000 rev/min
- Label the serum transfer tube
- Transfer serum into the serum transfer tube

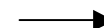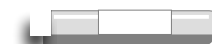

Store serum frozen until shipment.

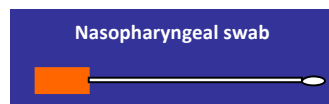

- Label the viral transport tube
- Collect the nasopharyngeal swab and place it in the viral transport medium tube.
- Store the swab until shipment to the local lab

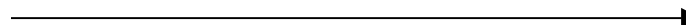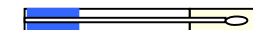

Store swab frozen until shipment.

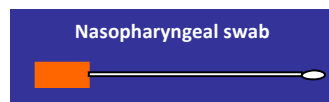

- Label the Amies tube
- Collect the nasopharyngeal I swab and place it in the Amies medium tube.
- Store the swab until shipment to the local lab

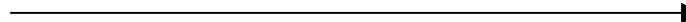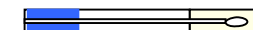

Store swab frozen until shipment.

## Control group: Visit 0 (day0)

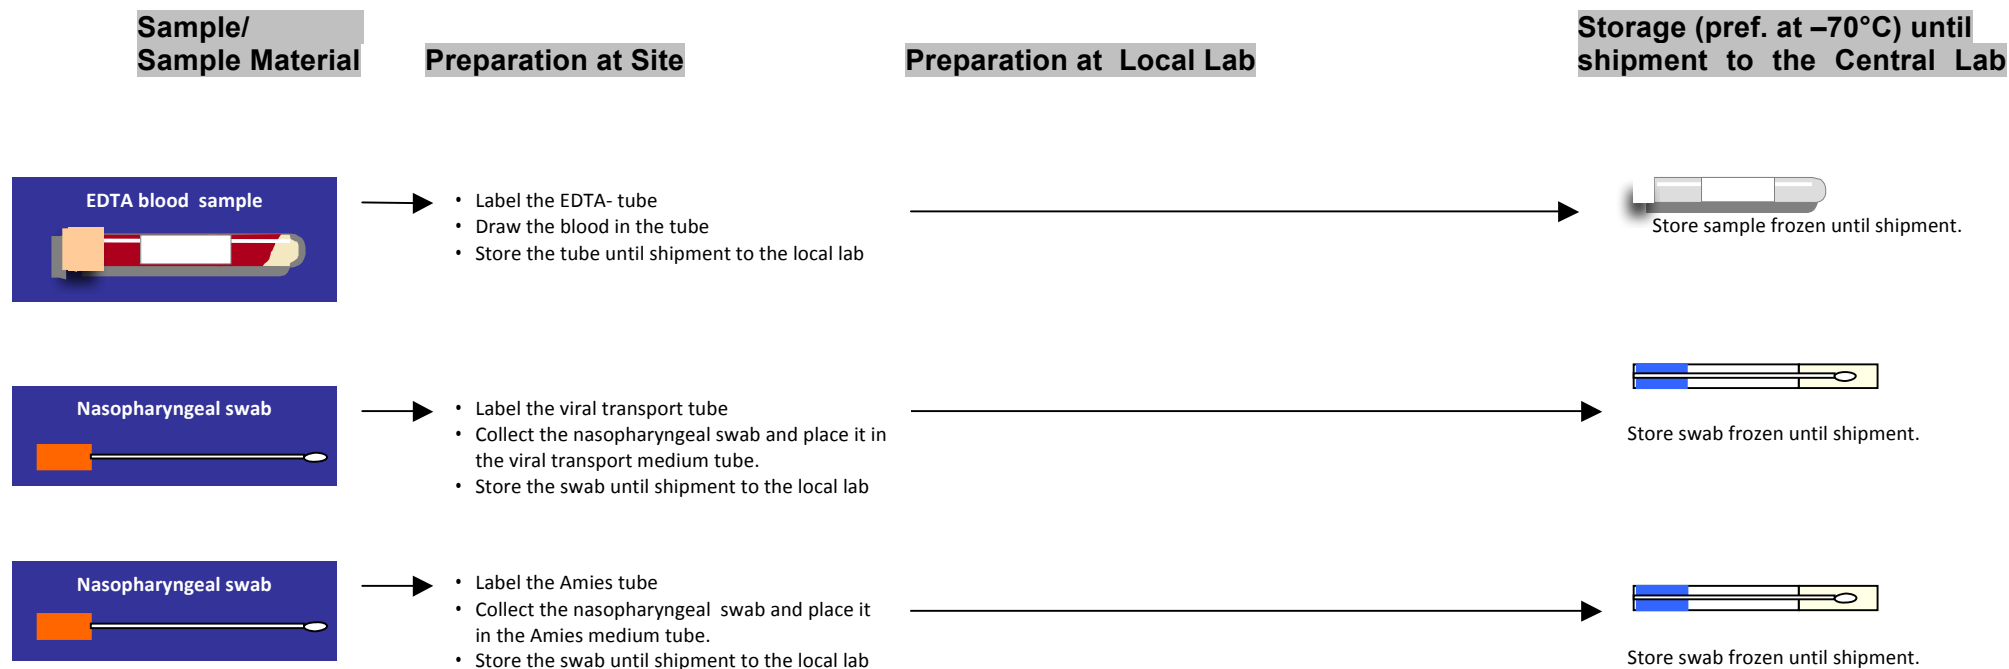

Supplement: Teepe_Supp_App.2.pdf [file Teepe_Supp_App.2.pdf]
